# Supplementary material for: Local symmetry breaking in SnO2nanocrystals with cobalt doping and its effect on optical properties
Source: Royal Society of Chemistry journal article supplement (doi:10.1039/c7nr07427a), 2018-01-01
Supplement: c7nr07427a1.pdf [file c7nr07427a1.pdf]

## Electronic Supplementary Information

### **Local symmetry breaking in SnO<sub>2</sub> nanocrystals with cobalt doping and its effect on the optical properties**

S. Roy<sup>a</sup>, Amish G. Joshi<sup>b</sup>, S. Chatterjee<sup>c</sup> and Anup K. Ghosh<sup>\*a</sup>

<sup>a</sup>*Materials Research Laboratory, Department of Physics, Institute of Science, Banaras Hindu University, Varanasi – 221005, India.*

<sup>b</sup>*CSIR-National Physical Laboratory, Dr. K.S. Krishnan Marg, New Delhi – 110012, India.*

<sup>c</sup>*Department of Physics, Indian Institute of Technology (Banaras Hindu University), Varanasi – 221005, India.*

*\*Email: [akghosh@bhu.ac.in](mailto:akghosh@bhu.ac.in)*

**SI-Raman:** Tin (IV) oxide crystallizes in rutile tetragonal structure with point group  $D_{4h}^{14}$  and space group  $P4_2/mnm$ . Since, each unit cell of SnO<sub>2</sub> consists of two Sn atoms and four O atoms ( $Z = 2$ ), there are total of 18 ( $= 3n$ ,  $n$  being the number of atoms per unit cell) branches for the vibrational modes in the first Brillouin zone. On the basis of group theory, the irreducible representation for normal lattice vibrational modes at  $\Gamma(0,0,0)$  point of the Brillouin zone is [1]:

$$\Gamma = {}^1\Gamma_1^+(A_{1g}) + {}^1\Gamma_2^+(A_{2g}) + {}^1\Gamma_3^+(B_{1g}) + {}^1\Gamma_4^+(B_{2g}) + 4 {}^2\Gamma_5^+(E_u) + 2 {}^1\Gamma_1^-(A_{2u}) + 2 {}^1\Gamma_4^-(B_{1u}) + 2 {}^1\Gamma_5^-(E_g) \dots \dots \dots (S1)$$

Among these 18 normal modes, 15 are optic modes and three modes are acoustic. One singly degenerate  $A_{2u}$  and three doubly degenerate  $E_u$  modes constitutes the IR active modes, the Raman active modes are three singly degenerate modes  $A_{1g}$ ,  $B_{1g}$ ,  $B_{2g}$  and the doubly degenerate mode  $E_g$ . The modes, the singly degenerate  $A_{2g}$  and both singly degenerate  $B_{1u}$  are silent modes. The remaining – one singly degenerate  $A_{2u}$  and one doubly degenerate  $E_u$  modes are acoustic. The Raman active modes consist of the vibrations of O atoms with the Sn atoms at rest. The modes  $A_{1g}$ ,  $B_{1g}$  and  $B_{2g}$  correspond to the vibrations in a plane perpendicular to the  $c$ -axis whereas the mode  $E_g$  corresponds to vibrations in the direction of  $c$  axis. Both  $A_{1g}$  and  $B_{2g}$  are related to the expansion and contraction of Sn-O bonds, where,  $B_{2g}$  is an asymmetric vibrational mode involving the contraction of all the six Sn-O bonds, of the Sn octahedron, coordinately at the same time, and for the symmetric vibrational mode  $A_{1g}$  two Sn-O bonds contract and the other four Sn-O bonds either contract or expand in opposite ways. The  $B_{1g}$  mode corresponds to the rotation of the whole octahedron of O atoms around the  $c$  axis and  $E_g$  mode corresponds to the translation motion of oxygen atoms in oxygen plane [2, 3]. Classically, only the Raman active modes  $A_{1g}$  (at  $\sim 638\text{cm}^{-1}$ ),  $B_{2g}$  (at  $\sim 782\text{cm}^{-1}$ ),  $E_g$  (at  $\sim 476\text{cm}^{-1}$ ) and sometimes low intensity  $B_{1g}$  (at  $\sim 123\text{cm}^{-1}$ ) are found in the Raman spectrum of bulk SnO<sub>2</sub> crystals under backscattering geometry owing to the selection rule of  $\vec{q} = 0$ , i.e., only the phonons near the Brillouin zone center of an infinite periodic crystal contribute to the Raman scattering of incident photons; where,  $\vec{q}$  is the wave-vector of the phonons satisfying the scattering conditions:

$$\vec{k}_0 - \vec{k}' = 2\pi\vec{\tau} - \vec{q}$$

$$E_0 - E' = \pm h\nu$$

where, photons of energy  $E_0 = \frac{\hbar^2 k_0^2}{2m_p}$  and momentum  $\hbar \vec{k}_0$  are incident on the sample, and are back-scattered with energy  $E' = \frac{\hbar^2 k'^2}{2m_p}$  and momentum  $\hbar \vec{k}'$ ;  $\vec{q}$  is the wave-vector, and  $h\nu$  is the energy of the phonons, +/- sign refer to the creation or annihilation of phonons during the scattering process such that Stokes' Raman shift corresponds to the creation of phonons; and  $\tau$  is a reciprocal lattice vector [3]. However, when  $\vec{q} = 0$  selection rule breaks down such that the phonons around the zone centre also contributes to the Raman spectra of nanocrystals, there occurs a wave-number shift with asymmetric broadening of the Raman active modes  $A_{1g}$ ,  $B_{2g}$  and  $E_g$  as compared to the bulk crystals, and in some cases, forbidden modes become Raman active along with inclusion of some surface activated modes, which are otherwise absent in their bulk counterpart. Except the inclusion of forbidden phonon modes in Raman spectra of the  $\text{SnO}_2$  nanocrystals, phonon dynamics of the wave number shift and the asymmetric broadening of the bulk Raman modes in the nanocrystals are best governed by the phonon dispersion curves based on the phonon confinement model [4].

**SI-FTIR:** Fig. 17 (main article) shows the FTIR spectra of the present  $\text{Sn}_{1-x}\text{Co}_x\text{O}_2$  nanocrystals and table S4 lists the observed bands. The most prominent band observed in the region of  $460 - 650 \text{ cm}^{-1}$  corresponds to various Sn – O vibrations [5] of  $\text{SnO}_2$  crystal structure. The band at  $1384 \text{ cm}^{-1}$  is arising from some impurity present in KBr used for dispersion of  $\text{Sn}_{1-x}\text{Co}_x\text{O}_2$  nanocrystals for recording the spectra, which is confirmed by the most intense band at  $1384 \text{ cm}^{-1}$  in the FTIR spectrum of the KBr used, as shown in the inset of fig. 17 (main article). The band at  $2345 \text{ cm}^{-1}$  is assigned to asymmetric stretching vibrations of  $\text{CO}_2$  molecules. The broad absorption band at around  $3405 \text{ cm}^{-1}$  and the relatively less broad band at  $1634 \text{ cm}^{-1}$  are assigned respectively to the asymmetric stretching vibrations of hydroxyl (-OH) groups and bending vibrations of H-O-H groups of  $\text{H}_2\text{O}$  molecules adsorbed on the surface of the nanocrystals. Since, as the Co doping concentration increases, the size of nanocrystals decreases (as evident from XRD and TEM) and hence the surface effects emerge, the increase in strength of -OH vibrational band at around  $3405 \text{ cm}^{-1}$  with doping indicates more presence of hydroxyl species covering the surface of nanocrystals ensuring completion of bonds for surface oxygen [5]. The above-mentioned bands in the spectral range of  $1384 \text{ cm}^{-1} - 3405 \text{ cm}^{-1}$  are also present in the FTIR spectra of the host KBr matrix (shown in inset of fig. 17) used for recording the spectra which suggests that these bands might be originating because of a combination of the adsorption of the corresponding molecules on the surface of the nanocrystals and their presence in the host KBr. It can be seen that with increase in Co doping concentration, the width as well as the wave number position of the bands remain constant, such that Co doping have no effect on these bands, asserting the above conclusion as well as the purity of  $\text{Sn}_{1-x}\text{Co}_x\text{O}_2$  nanocrystals. The band at around  $1100 \text{ cm}^{-1}$  might be due to Sn-OH vibrations [6]. The absence of any Co – OH bonds in the spectrum is due to limitation of instrument which might be because of very low doping concentration of cobalt in  $\text{Sn}_{1-x}\text{Co}_x\text{O}_2$  system. The presence of such hydroxyl species make the nanocrystals to be easily dispersed in polar solvents and the dispersions are also stable such that they can be used in many opto-electronic applications.

#### SI-UV-Visible:

*Determination of optical band gap from Tauc's plot:* The optical band gap ( $E_g$ ) of the present  $\text{Sn}_{1-x}\text{Co}_x\text{O}_2$  nanocrystals have been determined experimentally by Tauc's plot using eqn. (S2):

$$F(R)h\nu = B(h\nu - E_g)^n \dots \dots \dots (S2)$$

where,  $F(R)$  is the Kubelka-Munk function as described in eqn. (S3) and is proportional to the absorption coefficient ( $\alpha$ ):

$$F(R) = \frac{(1 - R)^2}{2R} \dots \dots \dots (S3)$$

$h\nu$  is the incident photon energy,  $B$  is a constant and  $n = \frac{1}{2}, \frac{3}{2}, 2$  or  $3$  depending upon the nature of electronic transition responsible for the absorption. For the determination of the optical band gap ( $E_g$ ),  $(F(R)h\nu)^{1/n}$  from eqn. (S2) is plotted as ordinate against the photon energy  $h\nu$  (in eV) as abscissa and the most linear region of the obtained curve is extrapolated to  $F(R) = 0$ . The point where the extrapolated line cuts the  $x$ -axis corresponding to  $F(R) = 0$  yields the optical band gap of the semiconductor.

*Determination of Urbach's energy:* The Urbach type absorption is represented by:

$$\alpha(E) = \alpha_0 \exp\left(\frac{E}{E_u}\right) \dots \dots \dots (S4)$$

where,  $\alpha(E)$  is the absorption coefficient of the material at incident photon energy  $E$ ,  $\alpha_0$  is a coefficient which depends upon the material and  $E_u$  is the Urbach energy. Since,  $F(R)$ , given by eqn. (S3), is proportional to  $\alpha(E)$ , eqn. (S4) has been modified to eqn. (S5) for the determination of the Urbach energy of the present  $\text{Sn}_{1-x}\text{Co}_x\text{O}_2$  nanoparticles:

$$F(R) = \alpha_0 \exp\left(\frac{E}{E_u}\right) \dots \dots \dots (S5)$$

Hence,

$$\ln(F(R)) = \ln(\alpha_0) + \frac{E}{E_u} \dots \dots \dots (S6)$$

$\ln(F(R))$  has been plotted as ordinate against the incident photon energy  $E$  as abscissa and the inverse of the slope of the linear fitting of the most linear portion of the graph directly gives the Urbach energy  $E_u$  of the semiconductors.

## References:

1. A. Diéguez, A. Romano-Rodríguez, A. Vilá and J. R. Morante, *Journal of Applied Physics*, 2001, **90**, 1550–1557.
2. P. Sangeetha, V. Sasirekha and V. Ramakrishnan, *Journal of Raman Spectroscopy*, 2011, **42**, 1634–1639.
3. J. G. Traylor, H. G. Smith, R. M. Nicklow and M. K. Wilkinson, *Phys. Rev. B*, 1971, **3**, 3457–3472.
4. K. Roodenko, I. A. Goldthorpe, P. C. McIntyre and Y. J. Chabal, *Phys. Rev. B*, 2010, **82**, 115210.
5. L. Abello, B. Bochu, A. Gaskov, S. Koudryavtseva, G. Lucazeau and M. Roumyantseva, *Journal of Solid State Chemistry*, 1998, **135**, 78 – 85.
6. J. Suffner, P. Ágoston, J. Kling and H. Hahn, *Journal of Nanoparticle Research*, 2010, **12**, 2579–2588.

Table S1: Results from the Sn3d, O1s and Co2p core level X-ray photoemission spectroscopy (XPS) of the  $\text{Sn}_{1-x}\text{Co}_x\text{O}_2$  ( $x = 0.00, 0.02$  and  $0.04$ ) nanocrystals.

| Co doping conc. (x) | Constituents | B.E. of XPS peak (in eV) | Origin of XPS peak                                                               | Spin-Orbit Splitting (in eV) | Oxidation state of constituent | FWHM of XPS peak (in eV) | Normalised Area (= Atomic Area/ASF) | Atomic % of Co constituents    |                  |                  | Atomic Ratio of constituents |                      |         |         |  |  |  |  |  |
|---------------------|--------------|--------------------------|----------------------------------------------------------------------------------|------------------------------|--------------------------------|--------------------------|-------------------------------------|--------------------------------|------------------|------------------|------------------------------|----------------------|---------|---------|--|--|--|--|--|
|                     |              |                          |                                                                                  |                              |                                |                          |                                     | Co <sub>3</sub> O <sub>4</sub> | Co <sup>2+</sup> | Co <sup>3+</sup> | Adsorbed O: Lattice O        | Sn <sub>i</sub> : Sn | δ       |         |  |  |  |  |  |
| 0.000               | Sn           | Sn 3d Core               |                                                                                  |                              |                                |                          |                                     |                                |                  |                  |                              |                      |         |         |  |  |  |  |  |
|                     |              | 486.611                  | Lattice Sn 3d <sub>5/2</sub> in SnO <sub>2</sub>                                 | 8.41                         | +4                             | 1.3                      | 8739.642                            |                                |                  | -                | 0.37713                      | 0                    | 0.60223 |         |  |  |  |  |  |
|                     |              | 495.021                  | Lattice Sn 3d <sub>3/2</sub> in SnO <sub>2</sub>                                 |                              |                                |                          |                                     |                                |                  |                  |                              |                      |         |         |  |  |  |  |  |
|                     |              |                          |                                                                                  |                              |                                |                          |                                     |                                |                  |                  |                              |                      |         |         |  |  |  |  |  |
|                     | O            | O 1s core                |                                                                                  |                              |                                |                          |                                     |                                |                  |                  |                              |                      |         |         |  |  |  |  |  |
|                     |              | 530.441                  | O <sup>2-</sup> in SnO <sub>2</sub> lattice                                      | -                            | -2                             | 1.207                    | 12216.043                           |                                |                  |                  |                              |                      |         |         |  |  |  |  |  |
|                     |              | 531.579                  | Surface dangling bonds                                                           | -                            | -                              | 1.956                    | 4606.979                            |                                |                  |                  |                              |                      |         |         |  |  |  |  |  |
|                     |              |                          |                                                                                  |                              |                                |                          |                                     |                                |                  |                  |                              |                      |         |         |  |  |  |  |  |
| 0.020               | Sn           | Sn 3d Core               |                                                                                  |                              |                                |                          |                                     |                                |                  |                  |                              | 0.18683              | 0.06632 | 0.49301 |  |  |  |  |  |
|                     |              | 486.236                  | Lattice Sn 3d <sub>5/2</sub> in SnO <sub>2</sub>                                 | 8.41                         | +4                             | 1.8                      | 68198.739                           |                                |                  |                  |                              |                      |         |         |  |  |  |  |  |
|                     |              | 494.646                  | Lattice Sn 3d <sub>3/2</sub> in SnO <sub>2</sub>                                 |                              |                                |                          |                                     |                                |                  |                  |                              |                      |         |         |  |  |  |  |  |
|                     |              | 484.098                  | 3d <sub>5/2</sub> of Sn <sub>i</sub>                                             | -                            | 0                              | 1.83                     | 4522.777                            |                                |                  |                  |                              |                      |         |         |  |  |  |  |  |
|                     |              | 477.859                  | Mg-K <sub>α3</sub> X-ray satellite peak w.r.t SnO <sub>2</sub> 3d <sub>5/2</sub> |                              |                                | 1.74                     |                                     |                                |                  |                  |                              |                      |         |         |  |  |  |  |  |
|                     |              | 476.066                  | Mg-K <sub>α4</sub> X-ray satellite peak w.r.t SnO <sub>2</sub> 3d <sub>5/2</sub> |                              |                                | 1.77                     |                                     |                                |                  |                  |                              |                      |         |         |  |  |  |  |  |
|                     |              |                          |                                                                                  |                              |                                |                          |                                     |                                |                  |                  |                              |                      |         |         |  |  |  |  |  |
|                     |              | O1s Core                 |                                                                                  |                              |                                |                          |                                     |                                |                  |                  |                              |                      |         |         |  |  |  |  |  |

|  |             |                                                                                                            |                                                                                                                |        |    |         |            |                                         |                                                        |                                                        |  |  |  |
|--|-------------|------------------------------------------------------------------------------------------------------------|----------------------------------------------------------------------------------------------------------------|--------|----|---------|------------|-----------------------------------------|--------------------------------------------------------|--------------------------------------------------------|--|--|--|
|  | O           | 529.<br>816                                                                                                | O <sup>2-</sup> in<br>SnO <sub>2</sub><br>lattice                                                              | -      | -2 | 1.7     | 116586.029 |                                         |                                                        |                                                        |  |  |  |
|  |             | 531.<br>524                                                                                                | Surface<br>dangling<br>bonds                                                                                   | -      |    | 1.7     | 21782.325  |                                         |                                                        |                                                        |  |  |  |
|  |             | 519.<br>772                                                                                                | Mg-K <sub>α4</sub><br>X-ray<br>satellite<br>peak<br>w.r.t<br>lattice<br>O <sup>2-</sup> in<br>SnO <sub>2</sub> | -      |    | 1.7     |            |                                         |                                                        |                                                        |  |  |  |
|  |             | 521.<br>462                                                                                                | Mg-K <sub>α3</sub><br>X-ray<br>satellite<br>peak<br>w.r.t<br>lattice<br>O <sup>2-</sup> in<br>SnO <sub>2</sub> | -      |    | 1.7     |            |                                         |                                                        |                                                        |  |  |  |
|  |             |                                                                                                            |                                                                                                                |        |    |         |            | 14.8%<br>of the<br>total<br>Co<br>conc. | 66.78<br>% of<br>the<br>total<br>dope<br>d Co<br>conc. | 33.16<br>% Of<br>the<br>total<br>dope<br>d Co<br>conc. |  |  |  |
|  | Co          | Co 2p Core                                                                                                 |                                                                                                                |        |    |         |            |                                         |                                                        |                                                        |  |  |  |
|  |             | 798.<br>549                                                                                                | Doped<br>Co <sup>2+</sup> 2p <sub>1/2</sub><br>principal<br>peak                                               | 18.605 | +2 | 3.43    | 2850.987   |                                         |                                                        |                                                        |  |  |  |
|  |             | 779.<br>944                                                                                                | Doped<br>Co <sup>2+</sup> 2p <sub>3/2</sub><br>principal<br>peak                                               |        |    | 3.43    |            |                                         |                                                        |                                                        |  |  |  |
|  |             | 794.<br>749                                                                                                | Doped<br>Co <sup>3+</sup> 2p <sub>1/2</sub><br>principal<br>peak                                               | 18.276 | +3 | 3.43    | 1416.018   |                                         |                                                        |                                                        |  |  |  |
|  |             | 776.<br>473                                                                                                | Doped<br>Co <sup>3+</sup> 2p <sub>3/2</sub><br>principal<br>peak                                               |        |    | 3.43    |            |                                         |                                                        |                                                        |  |  |  |
|  |             | 806.<br>047                                                                                                | Doped<br>Co <sup>2+</sup> 2p <sub>1/2</sub><br>satellite<br>peak                                               | 22.422 | +2 | 2.453   | 647.550    |                                         |                                                        |                                                        |  |  |  |
|  |             | 783.<br>625                                                                                                | Doped<br>Co <sup>2+</sup> 2p <sub>3/2</sub><br>satellite<br>peak                                               |        |    | 3.638   |            |                                         |                                                        |                                                        |  |  |  |
|  | 795.<br>808 | Doped-<br>precipitat<br>ed out<br>Co <sub>3</sub> O <sub>4</sub><br>2p <sub>1/2</sub><br>principal<br>peak | -                                                                                                              |        | 2  | 854.938 |            |                                         |                                                        |                                                        |  |  |  |

[illegible]

|  |    |             |                                                                                                                                          |       |              |       |          |  |  |  |  |  |  |  |
|--|----|-------------|------------------------------------------------------------------------------------------------------------------------------------------|-------|--------------|-------|----------|--|--|--|--|--|--|--|
|  |    |             | peak<br>w.r.t<br>lattice<br>O <sup>2-</sup> in<br>SnO <sub>2</sub>                                                                       |       |              |       |          |  |  |  |  |  |  |  |
|  |    | 521.<br>636 | Mg-K <sub>α3</sub><br>X-ray<br>satellite<br>peak<br>w.r.t<br>lattice<br>O <sup>2-</sup> in<br>SnO <sub>2</sub>                           |       |              |       | 1.7      |  |  |  |  |  |  |  |
|  |    |             |                                                                                                                                          |       |              |       |          |  |  |  |  |  |  |  |
|  | Co | Co 2p Core  |                                                                                                                                          |       |              |       |          |  |  |  |  |  |  |  |
|  |    | 799.<br>438 | Doped<br>Co <sup>2+</sup> 2p <sub>1/2</sub><br>principal<br>peak                                                                         | 18.95 | +2           | 3.51  | 1935.133 |  |  |  |  |  |  |  |
|  |    | 780.<br>488 | Doped<br>Co <sup>2+</sup> 2p <sub>3/2</sub><br>principal<br>peak                                                                         |       |              | 3.509 |          |  |  |  |  |  |  |  |
|  |    | 798.<br>288 | Doped<br>Co <sup>3+</sup> 2p <sub>1/2</sub><br>principal<br>peak                                                                         | 18.08 | 18.605<br>+3 | 3.51  | 2462.973 |  |  |  |  |  |  |  |
|  |    | 780.<br>208 | Doped<br>Co <sup>3+</sup> 2p <sub>3/2</sub><br>principal<br>peak                                                                         |       |              | 3.51  |          |  |  |  |  |  |  |  |
|  |    | 805.<br>776 | Doped<br>Co <sup>2+</sup> 2p <sub>1/2</sub><br>satellite<br>peak                                                                         | -     | 20.811<br>+2 | 3.145 | 1532.232 |  |  |  |  |  |  |  |
|  |    | 784.<br>965 | Doped<br>Co <sup>2+</sup> 2p <sub>3/2</sub><br>satellite<br>peak                                                                         |       |              | 4.464 |          |  |  |  |  |  |  |  |
|  |    | 795.<br>735 | Doped-<br>precipitat<br>ed out<br>Co <sub>3</sub> O <sub>4</sub><br>2p <sub>1/2</sub><br>principal<br>peak                               | -     |              | 2.1   | 2048.912 |  |  |  |  |  |  |  |
|  |    | 801.<br>825 | combinat<br>ion of x-<br>ray<br>energy<br>loss of<br>doped Co<br>2p <sub>3/2</sub> and<br>satellite<br>of Co <sub>3</sub> O <sub>4</sub> |       |              | 3.459 |          |  |  |  |  |  |  |  |

|  |  |         |                                                                   |  |  |       |  |  |  |  |  |  |  |
|--|--|---------|-------------------------------------------------------------------|--|--|-------|--|--|--|--|--|--|--|
|  |  | 792.625 | X-ray satellite corresponding to doped Co 2p <sub>1/2</sub> state |  |  | 4.18  |  |  |  |  |  |  |  |
|  |  | 776.525 | X-ray satellite corresponding to doped Co 2p <sub>3/2</sub> state |  |  | 2.638 |  |  |  |  |  |  |  |

Table S2: Rietveld refinement parameters and important results of the  $\text{Sn}_{1-x}\text{Co}_x\text{O}_2$  nanocrystals.

| Doping Concentration (x)/ Constituents |                  | Wyckoff Parameters |                                           | Normalised (w.r.t. 1) Site Occupancy | Bond Lengths (in nm)                                              | Average Crystallite Size (in nm)                 | Lattice Parameters                       |                                          | $d_{hkl}$ (in nm)                          | $\chi^2$ |
|----------------------------------------|------------------|--------------------|-------------------------------------------|--------------------------------------|-------------------------------------------------------------------|--------------------------------------------------|------------------------------------------|------------------------------------------|--------------------------------------------|----------|
|                                        |                  | Wyckoff Site       | Wyckoff Positions (x, y, z)               |                                      |                                                                   |                                                  | a = b (in nm)                            | c (in nm)                                |                                            |          |
|                                        |                  |                    |                                           |                                      |                                                                   |                                                  |                                          |                                          |                                            |          |
| x = 0.000 (Co <sub>0.0</sub> )         | Sn <sup>4+</sup> | 2a                 | x = 0.00000<br>y = 0.00000<br>z = 0.00000 | 0.986                                | $d_{O-Sn}^{axial}$ = 0.20062                                      | D <sub>S-S</sub> = 11.42125                      | From Rietveld = 0.47381 (σ = 2.03973E-4) | From Rietveld = 0.31868 (σ = 9.43679E-6) | $d_{110}$ = 0.33503<br>$d_{101}$ = 0.26443 | 4.16     |
|                                        | O <sup>2-</sup>  | 4f                 | x = 0.29809<br>y = 0.29809<br>z = 0.00000 | 0.903                                | $d_{O-Sn}^{equatorial}$ = 0.20846                                 | From TEM = 11.01nm                               |                                          |                                          |                                            |          |
| x = 0.005 (Co <sub>0.5</sub> )         | Sn <sup>4+</sup> | 2a                 | x = 0.00000<br>y = 0.00000<br>z = 0.00000 | 0.995                                | $d_{O-Sn}^{axial}$ = 0.20116<br>$d_{O-Sn}^{equatorial}$ = 0.20888 | D <sub>S-S</sub> = 9.12197                       | From Rietveld = 0.47387 (σ = 2.03973E-4) | From Rietveld = 0.31871 (σ = 9.43679E-6) | $d_{110}$ = 0.33507<br>$d_{101}$ = 0.26446 | 4.05     |
|                                        | Co <sup>2+</sup> | 2a                 | x = 0.00000<br>y = 0.00000<br>z = 0.00000 | 0.0049                               |                                                                   |                                                  |                                          |                                          |                                            |          |
|                                        | O <sup>2-</sup>  | 4f                 | x = 0.29444<br>y = 0.29444<br>z = 0.00000 | 0.912                                |                                                                   |                                                  |                                          |                                          |                                            |          |
| x = 0.020 (Co <sub>2.0</sub> )         | Sn <sup>4+</sup> | 2a                 | x = 0.00000<br>y = 0.00000<br>z = 0.00000 | 0.972                                | $d_{O-Sn}^{axial}$ = 0.19599<br>$d_{O-Sn}^{equatorial}$ = 0.2114  | D <sub>S-S</sub> = 8.2434                        | From Rietveld = 0.47364 (σ = 2.03973E-4) | From Rietveld = 0.31869 (σ = 9.43679E-6) | $d_{110}$ = 0.33491<br>$d_{101}$ = 0.26440 | 4.02     |
|                                        | Co <sup>2+</sup> | 2a                 | x = 0.00000<br>y = 0.00000<br>z = 0.00000 | 0.028                                |                                                                   |                                                  |                                          |                                          |                                            |          |
|                                        | O <sup>2-</sup>  | 4f                 | x = 0.29874<br>y = 0.29874<br>z = 0.00000 | 0.936                                |                                                                   |                                                  |                                          |                                          |                                            |          |
| x = 0.030 (Co <sub>3.0</sub> )         | Sn <sup>4+</sup> | 2a                 | x = 0.00000<br>y = 0.00000<br>z = 0.00000 | 0.969                                | $d_{O-Sn}^{axial}$ = 0.18142<br>$d_{O-Sn}^{equatorial}$ = 0.21043 | D <sub>S-S</sub> = 7.71157<br>From TEM = 7.58 nm | From Rietveld = 0.47372 (σ = 2.03973E-4) | From Rietveld = 0.31870 (σ = 9.43679E-6) | $d_{110}$ = 0.33497<br>$d_{101}$ = 0.26442 | 3.87     |
|                                        | Co <sup>2+</sup> | 2a                 | x = 0.00000<br>y = 0.00000<br>z = 0.00000 | 0.030                                |                                                                   |                                                  |                                          |                                          |                                            |          |
|                                        | O <sup>2-</sup>  | 4f                 | x = 0.29866<br>y = 0.29866<br>z = 0.00000 | 0.949                                |                                                                   |                                                  |                                          |                                          |                                            |          |

|                                   |                  |    |                                           |       |                                                                                                             |                               |                                                             |                                                             |                                                                    |      |
|-----------------------------------|------------------|----|-------------------------------------------|-------|-------------------------------------------------------------------------------------------------------------|-------------------------------|-------------------------------------------------------------|-------------------------------------------------------------|--------------------------------------------------------------------|------|
| x = 0.040<br>(Co <sub>4,0</sub> ) | Sn <sup>4+</sup> | 2a | x = 0.00000<br>y = 0.00000<br>z = 0.00000 | 0.959 | d <sub>O-Sn</sub> <sup>axial</sup><br>= 0.19266<br><br>d <sub>O-Sn</sub> <sup>equatorial</sup><br>= 0.21347 | D <sub>s-s</sub> =<br>7.34007 | From<br>Rietveld<br>=<br>0.47335<br>(σ =<br>2.03973E<br>-4) | From<br>Rietveld<br>=<br>0.31870<br>(σ =<br>9.43679E<br>-6) | d <sub>110</sub> =<br>0.33470<br><br>d <sub>101</sub> =<br>0.26436 | 3.90 |
|                                   | Co <sup>2+</sup> | 2a | x = 0.00000<br>y = 0.00000<br>z = 0.00000 | 0.040 |                                                                                                             |                               |                                                             |                                                             |                                                                    |      |
|                                   | O <sup>2-</sup>  | 4f | x = 0.30201<br>y = 0.30201<br>z = 0.00000 | 0.986 |                                                                                                             |                               |                                                             |                                                             |                                                                    |      |

Table S3: Observed modes in Raman spectra of the Sn<sub>1-x</sub>Co<sub>x</sub>O<sub>2</sub> nanocrystals.

| S/No. | Mode Identification as in fig. 10 | Raman Shift (in cm <sup>-1</sup> ) | Mode Description                                                                                                     |
|-------|-----------------------------------|------------------------------------|----------------------------------------------------------------------------------------------------------------------|
| 01.   | A <sub>1g</sub>                   | 633.32 – 631.84 (red shift)        | A classical first order Raman mode ( <sup>1</sup> Γ <sub>1</sub> <sup>+</sup> )                                      |
| 02.   | B <sub>1g</sub>                   | 188.28 – 182.16 (red shift)        | A classical first order Raman mode ( <sup>1</sup> Γ <sub>3</sub> <sup>+</sup> )                                      |
| 03.   | B <sub>2g</sub>                   | 776.59 – 758.96 (red shift)        | A classical first order Raman mode ( <sup>1</sup> Γ <sub>4</sub> <sup>+</sup> )                                      |
| 04.   | E <sub>g</sub>                    | 452.52 – 460.09 (blue shift)       | A classical first order Raman mode ( <sup>2</sup> Γ <sub>5</sub> <sup>-</sup> )                                      |
| 05.   | S1                                | 249.59 – 243.60 (red shift)        | A Disorder Activated Raman Mode ( <sup>2</sup> Γ <sub>5</sub> <sup>+</sup> (1) TO)                                   |
| 06.   | S2                                | 267.33 – 260.89 (red shift)        | A Disorder Activated Raman Mode ( <sup>2</sup> Γ <sub>5</sub> <sup>+</sup> (1) LO)                                   |
| 07.   | S3                                | 316.87 – 299.68 (red shift)        | A Disorder Activated Raman Mode ( <sup>2</sup> Γ <sub>5</sub> <sup>+</sup> (2) TO)                                   |
| 08.   | S4                                | 332.95 – 317.55 (red shift)        | A Disorder Activated Raman Mode ( <sup>2</sup> Γ <sub>5</sub> <sup>+</sup> (2) LO)                                   |
| 09.   | S5                                | 359.29 – 355.90 (red shift)        | A Second Order Raman Mode corresponding to classical first order Raman mode <sup>1</sup> Γ <sub>3</sub> <sup>+</sup> |
| 10.   | S6                                | 606.27 – 603.10 (red shift)        | A Disorder Activated Raman Mode ( <sup>2</sup> Γ <sub>5</sub> <sup>+</sup> (3) TO)                                   |
| 11.   | S7                                | 715.07 – 723.19 (blue shift)       | A Disorder Activated Raman Mode ( <sup>1</sup> Γ <sub>1</sub> <sup>-</sup> LO)                                       |

Table S4: Observed Bands in the FTIR spectra of the Sn<sub>1-x</sub>Co<sub>x</sub>O<sub>2</sub> nanocrystals.

| S/No. | Wave number (in cm <sup>-1</sup> ) | Band Description                                                                                                                                      |
|-------|------------------------------------|-------------------------------------------------------------------------------------------------------------------------------------------------------|
| 01.   | 627.62 – 620.16 (red shift)        | Classically IR active TO <sup>2</sup> Γ <sub>5</sub> <sup>+</sup> (3) (E <sub>u</sub> (3)) mode (SnO asymmetric stretching vibrations in (xy0)-plane) |
| 02.   | 480.96 – 474.74 (red shift)        | Classically IR active TO <sup>1</sup> Γ <sub>1</sub> <sup>-</sup> (A <sub>2u</sub> ) mode (SnO asymmetric stretching vibrations along z-axis)         |
| 03.   | 529.95 – 522.16 (red shift)        | Disorder activated IR <sup>1</sup> Γ <sub>4</sub> <sup>-</sup> (2) (B <sub>1u</sub> (2)) mode (Atomic displacements along z axis)                     |
| 04.   | ≈ 1100 cm <sup>-1</sup>            | Sn-OH asymmetric stretching vibrations                                                                                                                |
| 05.   | ≈ 1384 cm <sup>-1</sup>            | Impurities in host KBr                                                                                                                                |
| 06.   | ≈ 1634 cm <sup>-1</sup>            | Bending vibrations of surface adsorbed H-O-H group                                                                                                    |
| 07.   | ≈ 2345 cm <sup>-1</sup>            | Asymmetric stretching vibrations of surface adsorbed CO <sub>2</sub> molecules                                                                        |
| 08.   | ≈ 3405 cm <sup>-1</sup>            | Asymmetric stretching vibrations of surface adsorbed hydroxyl (-OH) group                                                                             |

Table S5: Band Gap, Hump energy and Urbach energy of the Sn<sub>1-x</sub>Co<sub>x</sub>O<sub>2</sub> nanocrystals.

| Co Doping Concentration (x) | Band Gap (E <sub>g</sub> <sup>alw</sup> ) (in eV) | Band Gap (E <sub>g</sub> <sup>for</sup> ) (in eV) | Urbach Energy (E <sub>u</sub> ) (in eV) |
|-----------------------------|---------------------------------------------------|---------------------------------------------------|-----------------------------------------|
| 0.000                       | 3.69121                                           | 3.09632                                           | 0.25562                                 |
| 0.005                       | 3.56065                                           | 2.8611                                            | 0.34344                                 |
| 0.020                       | 3.53165                                           | 2.67604                                           | 0.39414                                 |

|       |         |         |         |
|-------|---------|---------|---------|
| 0.030 | 3.448   | 2.60699 | 0.44367 |
| 0.040 | 3.34309 | 2.46115 | 0.46242 |

Table S6: Room temperature PL peaks of the  $\text{Sn}_{1-x}\text{Co}_x\text{O}_2$  nanocrystals along with their possible origin.

| Co Doping Concentration (x) | Peak Designation | Peak Wavelength | Region of EM Spectrum | Possible origin of Peak                  |
|-----------------------------|------------------|-----------------|-----------------------|------------------------------------------|
|                             |                  | (in nm)         |                       |                                          |
|                             |                  |                 |                       |                                          |
| 0                           | 1                | 372.645         | UV                    | $eA^0$ transition                        |
|                             | 2                | 381.845         |                       | $eA^0$ -LO                               |
|                             | 3                | 423.542         | Visible (Violet)      | $V_O^x$ to $A^0$ transition              |
|                             | 4                | 435.201         |                       |                                          |
|                             | 5                | 446.188         |                       |                                          |
|                             | 6                | 460.313         | Visible (Blue)        | CBM to $V_O^+$<br>And CBM to $E_s$       |
|                             | 7                | 486.771         |                       |                                          |
|                             | 8                | 496.860         | Visible (Green)       | Shallow trap states ( $V_O^x$ ) to $E_s$ |
|                             | 9                | 508.520         |                       |                                          |
|                             | 10               | 519.730         |                       |                                          |
|                             | 11               | 529.820         |                       |                                          |
|                             |                  |                 |                       |                                          |
| 0.005                       | 1                | 373.359         | UV                    | $eA_0$ transition                        |
|                             | 2                | 381.929         |                       | $eA^0$ -LO                               |
|                             | 3                | 422.118         | Visible (Violet)      | $V_O^x$ to $A_0$ transition              |
|                             | 4                | 428.102         |                       |                                          |
|                             | 5                | 441.179         |                       |                                          |
|                             | 6                | 462.012         | Visible (Blue)        | CBM to $V_O^+$<br>And CBM to $E_s$       |
|                             | 7                | 486.835         |                       |                                          |
|                             | 8                | 494.813         | Visible (Green)       | Shallow trap states ( $V_O^x$ ) to $E_s$ |
|                             | 9                | 506.560         |                       |                                          |
|                             | 10               | 518.085         |                       |                                          |
|                             | 11               | 529.388         |                       |                                          |
|                             | 12               | 390.501         | UV                    | $eA^0$ -2LO                              |
|                             |                  |                 |                       |                                          |
| 0.02                        | 1                | 370.866         | UV                    | $eA_0$ transition                        |
|                             | 2                | 382.098         |                       | $eA^0$ -LO                               |
|                             | 3                | 422.484         | Visible (Violet)      | $V_O^x$ to $A_0$ transition              |
|                             | 4                | 430.139         |                       |                                          |
|                             | 5                | 442.388         |                       |                                          |
|                             | 6                | 459.667         | Visible (Blue)        | CBM to $V_O^+$<br>And CBM to $E_s$       |
|                             | 7                | 487.007         |                       |                                          |
|                             | 8                | 499.037         | Visible (Green)       | Shallow trap states ( $V_O^x$ ) to $E_s$ |
|                             | 9                | 510.629         |                       |                                          |
|                             | 10               | 520.909         |                       |                                          |
|                             | 11               | 530.314         |                       |                                          |
|                             | 12               | 393.332         | UV                    | $eA^0$ -2LO                              |

|      |    |         |                     |                                                                            |
|------|----|---------|---------------------|----------------------------------------------------------------------------|
|      |    |         |                     |                                                                            |
| 0.03 | 1  | 371.808 | UV                  | eA <sub>0</sub> transition                                                 |
|      | 2  | 382.148 |                     | eA <sup>0</sup> -LO                                                        |
|      | 3  | 423.670 | Visible<br>(Violet) | V <sub>O</sub> <sup>x</sup> to A <sub>0</sub><br>transition                |
|      | 4  | 431.205 |                     |                                                                            |
|      | 5  | 444.503 | Visible<br>(Blue)   | CBM to V <sub>O</sub> <sup>·</sup><br>And CBM to<br>E <sub>s</sub>         |
|      | 6  | 461.569 |                     |                                                                            |
|      | 7  | 486.170 | Visible<br>(Green)  | Shallow trap<br>states (V <sub>O</sub> <sup>x</sup> )<br>to E <sub>s</sub> |
|      | 8  | 495.478 |                     |                                                                            |
|      | 9  | 507.003 |                     |                                                                            |
|      | 10 | 518.306 |                     |                                                                            |
|      | 11 | 529.388 | UV                  | eA <sup>0</sup> -2LO                                                       |
|      | 12 | 392.612 |                     |                                                                            |
|      |    |         |                     |                                                                            |
| 0.04 | 1  | 373.138 | UV                  | eA <sub>0</sub> transition                                                 |
|      | 2  | 382.183 |                     | eA <sup>0</sup> -LO                                                        |
|      | 3  | 422.783 | Visible<br>(Violet) | V <sub>O</sub> <sup>x</sup> to A <sub>0</sub><br>transition                |
|      | 4  | 430.319 |                     |                                                                            |
|      | 5  | 443.173 | Visible<br>(Blue)   | CBM to V <sub>O</sub> <sup>·</sup><br>And CBM to<br>E <sub>s</sub>         |
|      | 6  | 461.569 |                     |                                                                            |
|      | 7  | 485.726 | Visible<br>(Green)  | Shallow trap<br>states (V <sub>O</sub> <sup>x</sup> )<br>to E <sub>s</sub> |
|      | 8  | 493.484 |                     |                                                                            |
|      | 9  | 505.008 |                     |                                                                            |
|      | 10 | 515.425 |                     |                                                                            |
|      | 11 | 529.388 | UV                  | eA <sup>0</sup> -2LO                                                       |
|      | 12 | 391.604 |                     |                                                                            |
|      | 13 | 520.079 | Visible             |                                                                            |

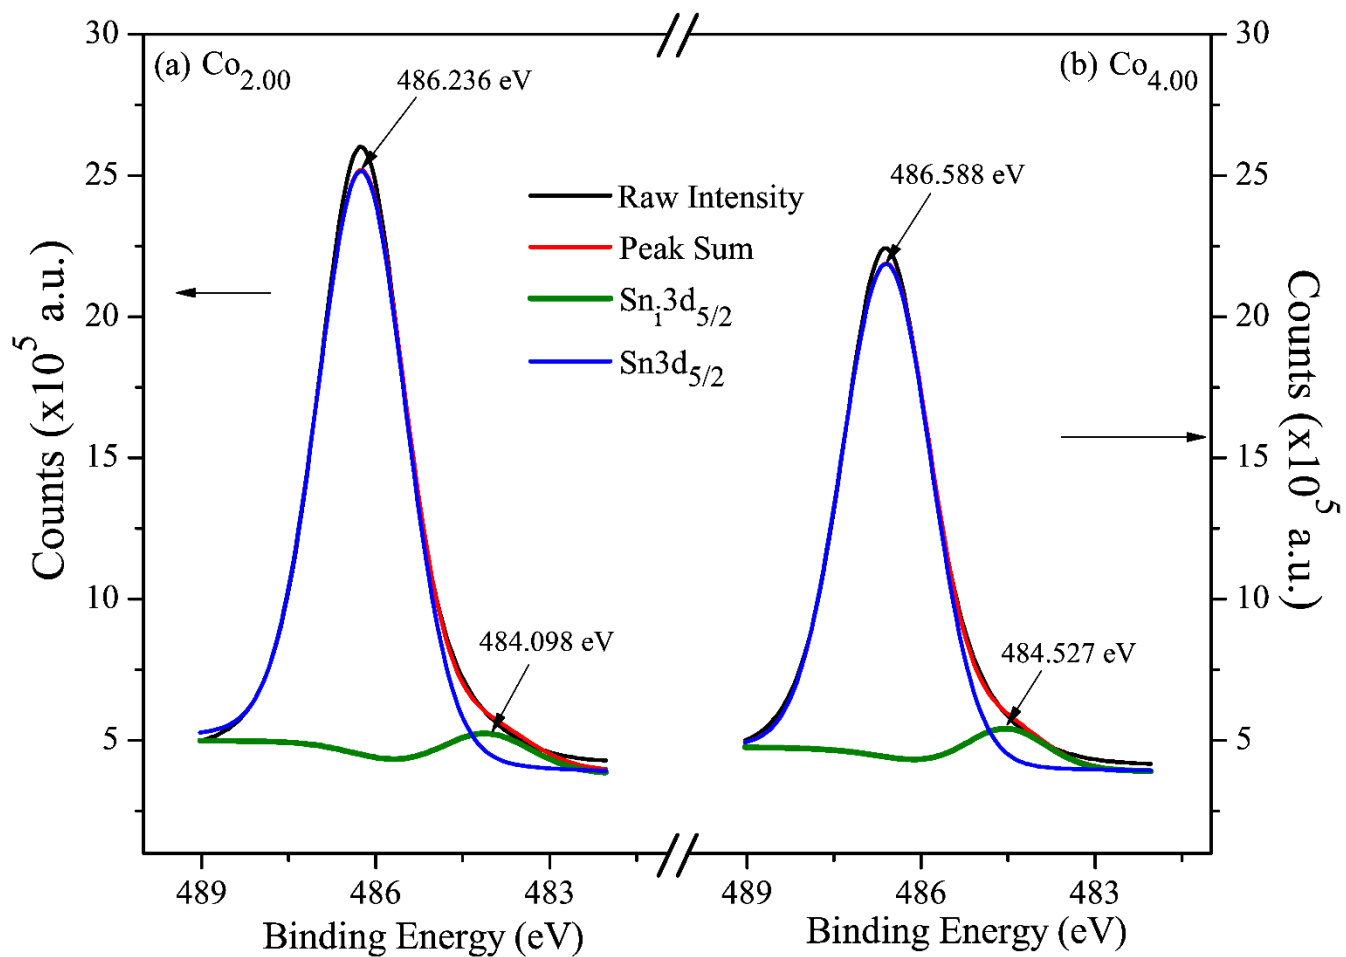

Fig. S1: Deconvoluted spectra of  $\text{Sn}3d_{5/2}$  for  $\text{Co}_{2.00}$  ( $x = 0.02$ ) and  $\text{Co}_{4.00}$  ( $x = 0.04$ ) nanocrystals.

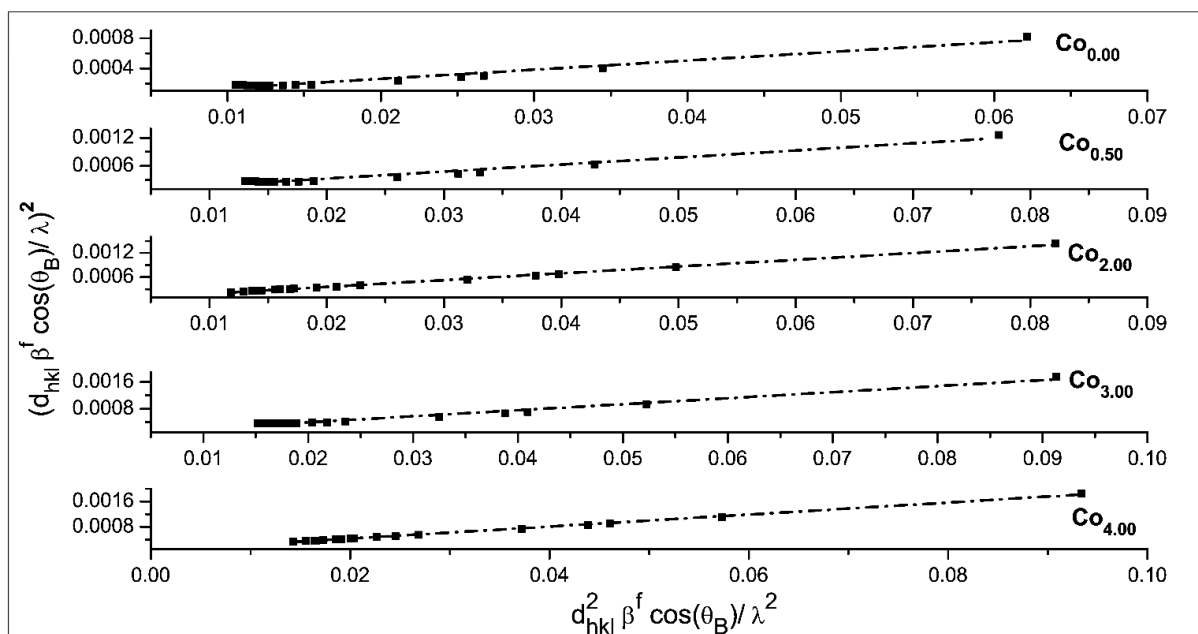

Fig. S2: Size-strain plots of the  $\text{Sn}_{1-x}\text{Co}_x\text{O}_2$  nanocrystals to estimate the average crystallite size  $D_{\text{S-S}}$  and average lattice strain  $\mathcal{E}_{\text{S-S}}$ .

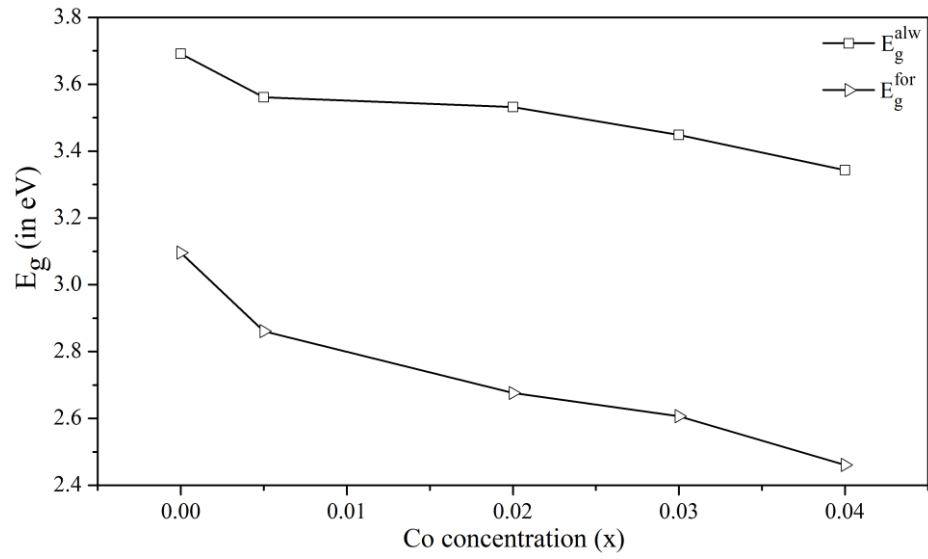

Fig. S3: Variation of direct allowed ( $E_g^{\text{alw}}$ ) and direct forbidden ( $E_g^{\text{for}}$ ) energy gaps of the  $\text{Sn}_{1-x}\text{Co}_x\text{O}_2$  nanocrystals with Co doping concentration.
